# Supplementary material for: Reverse intersystem crossing mechanisms in doped triangulenes
Source: Royal Society of Chemistry journal article supplement (doi:10.1039/d4cp00304g), 2024-01-01
Supplement: d4cp00304g1.pdf [file d4cp00304g1.pdf]

# Supporting Information:

## Reverse intersystem crossing mechanisms in doped triangulenes

Asier E. Izu,<sup>†,‡</sup> Jon M. Matxain,<sup>†,‡</sup> and David Casanova<sup>\*,†,¶</sup>

<sup>†</sup>*Donostia International Physics Center (DIPC), 20018 Donostia, Euskadi, Spain.*

<sup>‡</sup>*Polimero eta Material Aurreratuak: Fisika, Kimika eta Teknologia Saila, Kimika Fakultatea,  
Euskal Herriko Unibertsitatea (UPV/EHU), PK 1072, 20080 Donostia, Euskadi, Spain.*

<sup>¶</sup>*IKERBASQUE, Basque Foundation for Science, 48009 Bilbao, Euskadi, Spain.*

E-mail: david.casanova@dipc.org

### Contents

|          |                           |           |
|----------|---------------------------|-----------|
| <b>1</b> | <b>Molecular symmetry</b> | <b>S2</b> |
| <b>2</b> | <b>Method assessment</b>  | <b>S2</b> |

# 1 Molecular symmetry

Table S1: Symmetry point group for the ground state geometry of the studied molecules.

| molecule | symmetry |
|----------|----------|
| 1B       | $C_{3h}$ |
| 1N       | $D_{3h}$ |
| 1BN3a    | $C_{3h}$ |
| 1NB3a    | $C_{3h}$ |
| 1BN3b    | $D_{3h}$ |
| 1NB3b    | $D_{3h}$ |
| 2B       | $D_{3h}$ |
| 2N       | $D_{3h}$ |
| 2BN3a    | $D_{3h}$ |
| 2NB3a    | $C_{3h}$ |
| 2BN3b    | $C_{3h}$ |
| 2NB3b    | $C_{3h}$ |
| 2BN3c    | $D_{3h}$ |
| 2NB3c    | $D_{3h}$ |
| 2B4N3    | $C_{3h}$ |
| 2N4B3    | $C_{3h}$ |

# 2 Method assessment

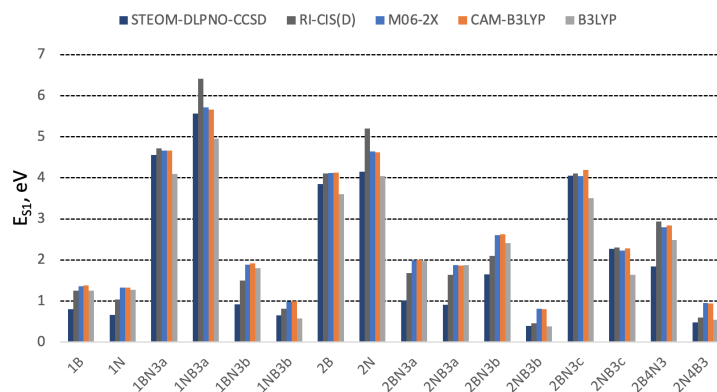

Figure S1:  $S_1$  excitation energies (in eV) computed with different methods and the def2-TZVP basis set.

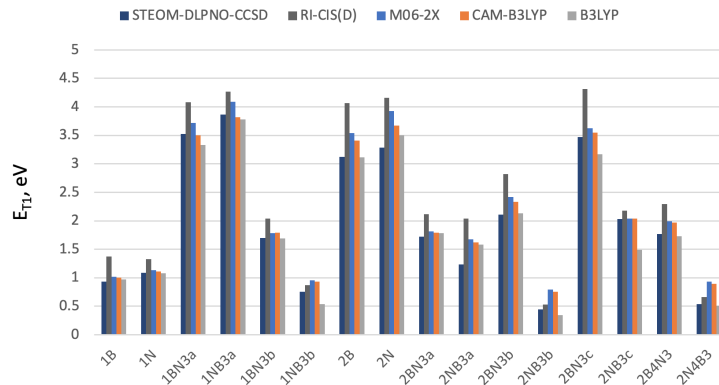

Figure S2:  $T_1$  excitation energies (in eV) computed with different methods and the def2-TZVP basis set.

Table S2: SF-TDDFT/6-31(d) excitation energies (eV) and energy difference (in eV), and  $\langle \hat{S}^2 \rangle$  of the two lowest excited states ( $R_1$ : root 1 and  $R_2$ : root 2).

| molecule | $E(R_1)$ | $\hat{S}^2(R_1)$ | $E(R_2)$ | $\hat{S}^2(R_2)$ | $\Delta E_{R_2-R_1}$ |
|----------|----------|------------------|----------|------------------|----------------------|
| 1B       | 0.97     | 0.90             | 1.36     | 1.25             | 0.39                 |
| 1N       | 1.11     | 0.89             | 1.56     | 1.29             | 0.39                 |
| 1BN3a    | 4.23     | 2.01             | 5.52     | 0.47             | 1.25                 |
| 1NB3a    | 4.37     | 2.01             | 5.78     | 1.02             | 1.41                 |
| 1BN3b    | 1.22     | 1.13             | 2.46     | 1.15             | 1.24                 |
| 1NB3b    | 1.08     | 1.06             | 1.31     | 1.29             | 0.23                 |
| 2B       | 3.80     | 1.09             | 3.92     | 1.88             | 0.12                 |
| 2N       | 4.25     | 1.06             | 4.31     | 1.90             | 0.06                 |
| 2BN3a    | 2.19     | 2.00             | 2.49     | 1.04             | 0.30                 |
| 2NB3a    | 1.02     | 1.35             | 1.74     | 2.68             | 0.72                 |
| 2BN3b    | 1.96     | 1.09             | 2.44     | 2.35             | 0.49                 |
| 2NB3b    | 0.95     | 1.08             | 1.10     | 1.39             | 0.15                 |
| 2BN3c    | 3.93     | 2.06             | 4.12     | 1.04             | 0.19                 |
| 2NB3c    | 2.11     | 1.39             | 2.29     | 0.79             | 0.18                 |
| 2B4N3    | 2.10     | 1.98             | 2.33     | 1.11             | 0.23                 |
| 2N4B3    | 1.11     | 1.06             | 1.25     | 1.36             | 0.14                 |

Table S3: Thermally equilibrium triplet states through the Boltzmann distribution.

| molecule | triplets in equilibrium |
|----------|-------------------------|
| 1B       | 1                       |
| 1N       | 1                       |
| 1BN3a    | 1-2                     |
| 1NB3a    | 1-3                     |
| 1BN3b    | 1                       |
| 1NB3b    | 1                       |
| 2B       | 1-2                     |
| 2N       | 1-3                     |
| 2BN3a    | 1-4                     |
| 2NB3a    | 1                       |
| 2BN3b    | 1-2                     |
| 2NB3b    | 1                       |
| 2BN3c    | 1-2                     |
| 2NB3c    | 1-3                     |
| 2B4N3    | 1-2                     |
| 2N4B3    | 1                       |

Table S4: Energies of molecules 2B4N3 and 1NB3a, for CIS and CIS(D) methods.

| molecule | CIS      |          |                 | CIS(D)   |          |                 |
|----------|----------|----------|-----------------|----------|----------|-----------------|
|          | $E(S_1)$ | $E(T_1)$ | $\Delta E_{ST}$ | $E(S_1)$ | $E(T_1)$ | $\Delta E_{ST}$ |
| 2B4N3    | 3.79     | 2.57     | 1.22            | 2.32     | 2.29     | 0.03            |
| 1NB3a    | 7.02     | 3.37     | 3.65            | 5.87     | 4.26     | 1.61            |

Table S5:  $S_1$  and  $T_n$  energies (eV) and SOCC values ( $cm^{-1}$ ),  $SOC_n$  refers to the SOCC between  $S_1$  and  $T_n$ .

|       | $E(S_1)$ | $T_1$ | $T_2$ | $T_3$ | $T_4$ | $T_5$ | $T_6$ | $SOC_1$ | $SOC_2$ | $SOC_3$ | $SOC_4$ | $SOC_5$ | $SOC_6$ |
|-------|----------|-------|-------|-------|-------|-------|-------|---------|---------|---------|---------|---------|---------|
| 1B    | 0.80     | 0.93  | 2.02  | 2.02  | 3.31  | 3.31  | 6.08  | 0.03    | 0.00    | 0.00    | 4.33    | 4.33    | 0.04    |
| 1N    | 0.67     | 1.09  | 2.05  | 2.05  | 4.83  | 5.37  | 5.54  | 0.00    | 0.02    | 0.03    | 0.01    | 0.00    | 3.50    |
| 1BN3a | 4.55     | 3.53  | 3.59  | 3.90  | 5.53  | 5.54  | 6.27  | 0.03    | 0.01    | 0.00    | 0.32    | 0.32    | 0.95    |
| 1NB3a | 5.57     | 3.86  | 3.87  | 3.90  | 5.37  | 5.54  | 7.05  | 1.19    | 0.86    | 0.49    | 0.11    | 0.86    | 0.03    |
| 1BN3b | 0.92     | 1.70  | 2.12  | 2.12  | 2.22  | 2.23  | 3.27  | 0.03    | 10.46   | 10.52   | 0.02    | 0.00    | 0.09    |
| 1NB3b | 0.65     | 0.75  | 1.89  | 1.90  | 2.45  | 3.10  | 3.10  | 0.00    | 0.00    | 0.01    | 0.00    | 0.01    | 0.01    |
| 2B    | 3.85     | 3.12  | 3.16  | 3.73  | 3.77  | 4.18  | 5.66  | 0.01    | 0.00    | 0.00    | 0.00    | 0.00    | 0.21    |
| 2N    | 4.15     | 3.28  | 3.28  | 3.29  | 3.52  | 3.98  | 5.31  | 0.02    | 0.01    | 0.01    | 0.00    | 0.00    | 0.00    |
| 2BN3a | 1.02     | 1.72  | 1.72  | 1.74  | 1.82  | 2.79  | 2.79  | 0.00    | 0.00    | 0.00    | 0.13    | 0.01    | 0.01    |
| 2NB3a | 0.91     | 1.23  | 1.47  | 1.47  | 1.78  | 3.06  | 3.07  | 0.04    | 0.00    | 0.00    | 0.03    | 0.00    | 0.00    |
| 2BN3b | 1.65     | 2.11  | 2.11  | 2.25  | 2.61  | 2.61  | 3.33  | 0.03    | 0.02    | 0.00    | 10.57   | 10.57   | 0.15    |
| 2NB3b | 0.39     | 0.45  | 1.81  | 1.81  | 1.91  | 1.91  | 2.04  | 0.01    | 0.00    | 0.00    | 0.62    | 0.61    | 0.00    |
| 2BN3c | 4.05     | 3.47  | 3.48  | 3.67  | 3.67  | 3.70  | 4.00  | 0.00    | 0.00    | 0.03    | 0.00    | 0.89    | 0.00    |
| 2NB3c | 2.27     | 2.03  | 2.08  | 2.09  | 2.70  | 2.71  | 3.81  | 0.00    | 0.14    | 0.01    | 0.79    | 0.38    | 0.02    |
| 2B4N3 | 1.84     | 1.77  | 1.77  | 2.38  | 2.49  | 2.49  | 2.63  | 0.04    | 0.01    | 0.02    | 0.68    | 0.66    | 0.68    |
| 2N4B3 | 0.48     | 0.54  | 1.89  | 1.90  | 1.90  | 1.90  | 2.14  | 0.00    | 0.00    | 0.00    | 1.07    | 1.07    | 0.00    |

Table S6: Transition energies (in eV) and SOCCs (in  $cm^{-1}$ ) of excited singlets states ( $S_n$ ) nearly degenerated to  $S_1$ .  $SOC_m$  refers to the SOCC between  $S_n$  and  $T_m$ .

|          | 1NB3a( $S_2$ ) | 1NB3a( $S_3$ ) | 2B( $S_2$ ) | 2N( $S_2$ ) |
|----------|----------------|----------------|-------------|-------------|
| $E(S_n)$ | 5.589          | 5.596          | 3.873       | 4.152       |
| $E(T_1)$ | 3.864          | 3.864          | 3.124       | 3.282       |
| $E(T_2)$ | 3.874          | 3.874          | 3.156       | 3.282       |
| $E(T_3)$ | 3.902          | 3.902          | 3.727       | 3.286       |
| $E(T_4)$ | 5.367          | 5.367          | 3.767       | 3.523       |
| $E(T_5)$ | 5.541          | 5.541          | 4.183       | 3.982       |
| $E(T_6)$ | 7.053          | 7.053          | 5.664       | 5.313       |
| $SOC_1$  | 0.06           | 0.05           | 0           | 0           |
| $SOC_2$  | 0.07           | 0.05           | 0.01        | 0.02        |
| $SOC_3$  | 0.04           | 0.02           | 0.02        | 0.01        |
| $SOC_4$  | 2.97           | 2.94           | 0           | 0           |
| $SOC_5$  | 3.5            | 3.8            | 0           | 0.03        |
| $SOC_6$  | 0.69           | 0.77           | 0.24        | 0           |
